# Supplementary material for: Syntheses, structures and fluorescent properties of two novel coordination polymers in the U–Cu–H3pdc system
Source: Royal Society of Chemistry journal article supplement (doi:10.1039/b500127g), 2005-01-01

Syntheses, Structures and Fluorescent Properties of Two Novel Coordination Polymers in the U-Cu-H<sub>3</sub>pdc System

Mark Frisch and Christopher L. Cahill

TGA for compound 2

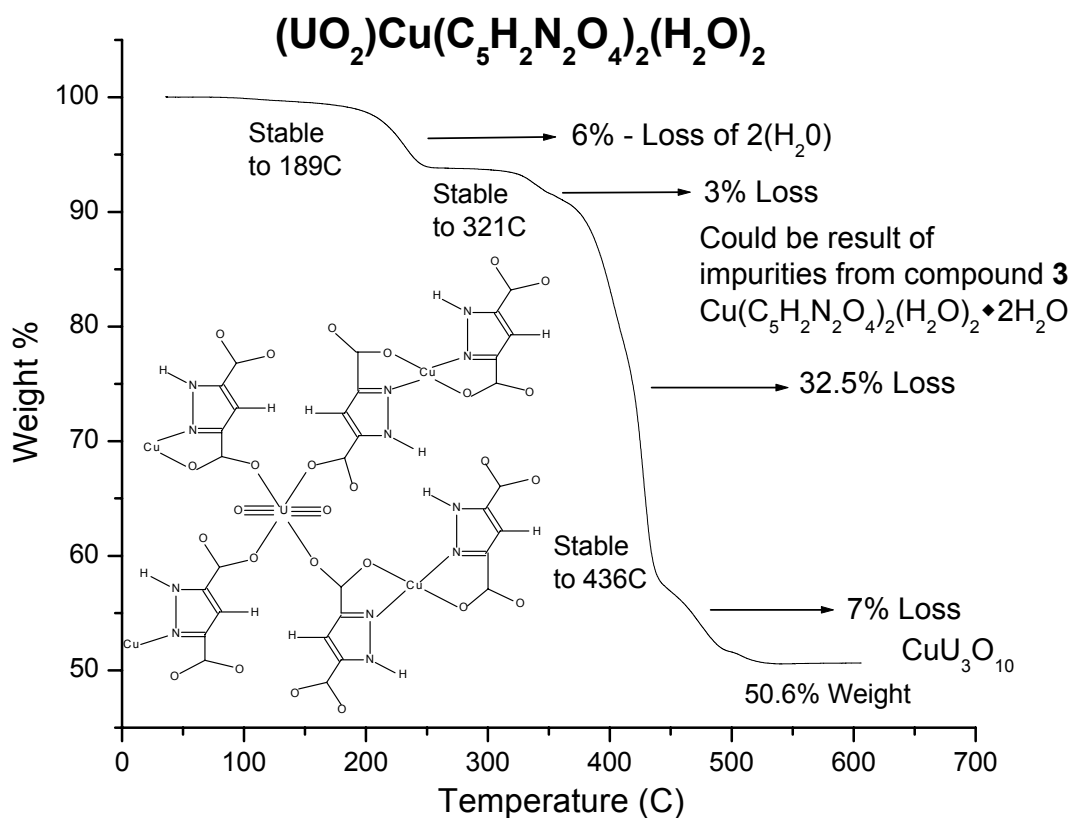

Supplement: b500127g.pdf [file b500127g.pdf]
